# Supplementary material for: Single cell atlas of the comorbidity mechanism between chronic obstructive pulmonary disease and lung adenocarcinoma: a study of multi-omics combined analysis
Source: PeerJ. 2026 Feb 6;14:e20672. doi: 10.7717/peerj.20672 (PMC12884963; doi:10.7717/peerj.20672)
Supplement: Supplemental Information 3 [file peerj-14-20672-s003.xlsx]

## Sheet: Sheet1
Grouping	Sample Number	CT Mean
		Internal reference genes	FCRLA	GREM1	MMP9
COPD	sample1	30.6515	31.8481	32.353	31.4885
COPD	sample1	30.8053	31.8155	32.0001	31.5639
COPD	sample1	30.9482	32.5032	30.2701	31.4999
COPD	sample2	29.3351	30.9468	30.8349	34.4754
COPD	sample2	29.5142	31.3059	31.0312	30.4644
COPD	sample3	30.2334	32.0758	32.6328	31.6168
COPD	sample3	30.796	33.1934	33.296	31.7957
COPD	sample3	30.2371	32.277	33.2257	31.452
COPD	sample4	33.1962	33.3044	33.3056	34.9388
COPD	sample4	33.3195	33.8542	33.9255	31.4449
COPD	sample4	33.4045	32.9174	32.5837	34.9499
COPD	sample5	31.7382	31.9588	34.0286	31.1343
COPD	sample5	31.969	33.1251	33.8229	30.7538
COPD	sample5	31.5867	33.0792	34.0412	31.8175
COPD	sample6	31.2999	32.2867	32.4609	34.1944
COPD	sample6	31.4636	31.7457	32.0163	34.6453
COPD	sample6	31.3384	32.9192	33.5199	34.9348
COPD	sample7	31.8182	31.2501	33.2704	31.7475
COPD	sample7	32.2499	31.6828	33.7392	32.2522
COPD	sample7	31.9744	31.4787	33.3305	32.1633
COPD	sample8	29.5614	32.9494	30.4172	31.2927
COPD	sample8	29.8504	32.9422	33.1733	32.2739
COPD	sample9	29.997	34.3044	30.923	31.8628
COPD	sample10	31.5343	32.9193	32.8575	32.3223
COPD	sample10	31.4393	32.5753	33.0239	32.8868
COPD	sample10	31.7596	32.4918	32.9501	32.2725
COPD	sample11	30.8315	34.5827	33.1774	31.3843
COPD	sample11	30.8839	32.6078	32.9433	31.4975
COPD	sample12	32.0124		33.5289	30.7846
COPD	sample12	32.3714	33.6227	34.5595	34.4664
normal	sample13	30.268	33.1137	33.3427	34.1681
normal	sample13	30.275	32.9989	33.1438	32.8596
normal	sample13	30.1522	32.947	33.3479	33.6503
normal	sample14	30.9374	33.9527	34.6319	33.7693
normal	sample14	30.9901	34.463	34.6972	33.5968
normal	sample14	30.8813	34.179	33.1812	33.7389
normal	sample15	32.0142	33.7746	34.8562	34.062
normal	sample15	31.907	33.5628	33.5031	34.8257
normal	sample16	32.3564	34.5517	34.1589	33.9379
normal	sample16	32.6633	35.9144	34.6516	35.0812
normal	sample17	32.3617	33.9178	34.733	34.9688
normal	sample17	32.0953	34.8982	34.8179	34.4508
normal	sample18	31.8583	33.5901	32.5243	32.9728
normal	sample18	30.9385	33.969	33.4423	33.4284
normal	sample18	31.2003	33.978	33.5125	33.1459
normal	sample19	32.9949	35.7564	36.6013	34.7239
normal	sample19	32.6766	36.6025	33.289	34.8898
normal	sample20	32.0286	34.2309	35.6462	33.1585
normal	sample20	31.9769	34.1689	34.5642	36.1304
normal	sample21	30.9365	33.2695	34.472	33.8916
normal	sample22	29.0576	32.7369	32.9327	33.5383
normal	sample22	29.1343	31.946	32.4987	32.936
normal	sample22	29.2316	31.6011	32.4612	33.7467
normal	sample23	30.3188	33.4543	33.1223	33.3402
normal	sample23	30.3676	33.056	32.9762	33.8073
normal	sample23	29.932	32.4518	32.9655	33.9353
normal	sample24	32.5202	35.8997	34.5669	34.6286
LUAD	sample25	30.9634	33.2735	33.7395	31.4851
LUAD	sample25	30.9056	33.1859	32.8705	33.3147
LUAD	sample25	30.8271	32.4713	32.7456	32.4268
LUAD	sample26	31.5967	33.0965	34.0125	34.3691
LUAD	sample26	31.6473	33.3558	30.7609	31.935
LUAD	sample26	31.5233	33.242	33.7412	31.5258
LUAD	sample27	31.1158	32.5983	31.3897	32.9562
LUAD	sample27	30.7724	33.0128	33.2641	30.5202
LUAD	sample27	31.1174	32.2479	32.9163	30.9613
LUAD	sample28	30.8985	32.8303	34.5568	33.5006
LUAD	sample28	31.1197	33.2291	30.1547	33.6089
LUAD	sample29	30.518	33.9662	32.9878	31.6847
LUAD	sample29	30.5586	34.4626	33.6131	32.9897
LUAD	sample29	30.5281	32.6385	33.6301	33.1209
LUAD	sample30	30.4025	32.5937	32.7963	32.2372
LUAD	sample30	30.5513	32.0737	32.2227	33.1367
LUAD	sample30	30.8631	32.212	33.152	32.9808
LUAD	sample31	31.2589	34.9726	32.5239	32.4212
LUAD	sample31	31.1213	33.4802	32.7535	31.9055
LUAD	sample32	32.1657	32.7465	33.1425	32.5709
LUAD	sample32	31.7983	33.5086	32.9848	31.8652
LUAD	sample33	30.647	33.6834	33.8658	31.9395
LUAD	sample33	30.3985	32.7747	33.4397	31.4352
LUAD	sample33	30.7107	33.3586	33.0478	33.317
LUAD	sample34	30.5949	32.3306	32.4514	32.8896
LUAD	sample34	30.3565	32.2103	32.6292	32.6058
LUAD	sample34	29.875	31.8455	32.1885	32.9717
LUAD	sample35	30.5306	32.9349	33.0832	31.2708
LUAD	sample35	30.6536	32.8391	32.8116	32.6463
LUAD	sample35	30.4773	32.7492	32.992	33.4816
LUAD	sample36	30.6152	33.9564	31.9538	31.1569
LUAD	sample36	32.8657	34.8814	33.8577	34.4052
