# Supplementary material for: Single cell atlas of the comorbidity mechanism between chronic obstructive pulmonary disease and lung adenocarcinoma: a study of multi-omics combined analysis
Source: PeerJ. 2026 Feb 6;14:e20672. doi: 10.7717/peerj.20672 (PMC12884963; doi:10.7717/peerj.20672)
Supplement: Supplemental Information 6 [file peerj-14-20672-s006.xlsx]

## Sheet: Sheet1
Item to check	Importance	Checklist
Experimental design
Definition of experimental and control groups	E	Lines 201-207
Number within each group	E	Lines 201-207
Assay carried out by the core or investigator’s laboratory?	D	Investigator’s laboratory
Acknowledgment of authors’ contributions	D	Lines 487-490
Sample
Description	E	Lines 201-207
Volume/mass of sample processed	D	NA
Microdissection or macrodissection	E	NA
Processing procedure	E	Lines 208-215
If frozen, how and how quickly?	E	NA
If fixed, with what and how quickly?	E	NA
Sample storage conditions and duration (especially for FFPEb samples)	E	NA
Nucleic acid extraction
Procedure and/or instrumentation	E	Lines 208-215
Name of kit and details of any modifications	E	Lines 208-215
Source of additional reagents used	D	NA
Details of DNase or RNase treatment	E	Lines 208-215
Contamination assessment (DNA or RNA)	E	NA
Nucleic acid quantification	E	Lines 208-215
Instrument and method	E	Lines 208-215
Purity (A260/A280)	D	NA
Yield	D	COPD-qPCR-outx10 LUAD-qPCR-OUTx10
RNA integrity: method/instrument	E	Lines 208-215
RIN/RQI or Cq of 3'_x0002_ and 5'_x0002_ transcripts	E	Lines 216-221
Electrophoresis traces	D	NA
Inhibition testing (Cq dilutions, spike, or other)	E	NA
Reverse transcription
Complete reaction conditions	E	Lines 208-215
Amount of RNA and reaction volume	E	Lines 208-215
Priming oligonucleotide (if using GSP) and concentration	E	Lines 208-215
Reverse transcriptase and concentration	E	Lines 208-215
Temperature and time	E	Lines 208-215
Manufacturer of reagents and catalogue numbers	D	Lines 208-215
Cqs with and without reverse transcription	D	Lines 208-215
Storage conditions of cDNA	D	Lines 208-215
qPCR target information
Gene symbol	E	Lines 208-215
Sequence accession number	E	Lines 208-215
Location of amplicon	D	NA
Amplicon length	E	Lines 208-215
In silico specificity screen (BLAST, and so on)	E	NA
Pseudogenes, retropseudogenes, or other homologs?	D	NA
Sequence alignment	D	NA
Secondary structure analysis of amplicon	D	NA
Location of each primer by exon or intron (if applicable)	E	NA
What splice variants are targeted?	E	NA
qPCR oligonucleotides
Primer sequences	E	Lines 216-221
RTPrimerDB identification number	D	NA
Probe sequences	D	NA
Location and identity of any modifications	E	NA
Manufacturer of oligonucleotides	D	Lines 208-215
Purification method	D	NA
qPCR protocol
Complete reaction conditions	E	Lines 208-215
Reaction volume and amount of cDNA/DNA	E	Lines 208-215
Primer, (probe), Mg2+, and dNTP concentrations	E	Lines 208-215
Polymerase identity and concentration	E	Lines 208-215
Buffer/kit identity and manufacturer	E	Lines 208-215
Exact chemical composition of the buffer	D	NA
Additives (SYBR Green I, DMSO, and so forth)	E	Lines 208-215
Manufacturer of plates/tubes and catalog number	D	NA
Complete thermocycling parameters	E	Lines 208-215
Reaction setup (manual/robotic)	D	NA
Manufacturer of qPCR instrument	E	Lines 208-215
qPCR validation
Evidence of optimization (from gradients)	D	NA
Specificity (gel, sequence, melt, or digest)	E	Melting curve analysis had a single peak
For SYBR Green I, Cq of the NTC	E	NA
Calibration curves with slope and y intercept	E	NA
PCR efficiency calculated from slope	E	PCR efficiency ranged from 92%-98%
CIs for PCR efficiency or SE	D	NA
r2 of calibration curve	E	NA
Linear dynamic range	E	NA
Cq variation at LOD	E	NA
CIs throughout range	D	NA
Evidence for LOD	E	NA
If multiplex, efficiency and LOD of each assay	E	NA
Data analysis
qPCR analysis program (source, version)	E	Lines 208-215
Method of Cq determination	E	Lines 208-215
Outlier identification and disposition	E	No outliers were identified
Results for NTCs	E	No available Cq value for all NTCs
Justification of number and choice of reference genes	E	Lines 208-215
Description of normalization method	E	Lines 208-215
Number and concordance of biological replicates	D	NA
Number and stage (reverse transcription or qPCR) of technical replicates	E	Lines 208-215
Repeatability (intraassay variation)	E	Present in Table COPD-qPCR-outx10 LUAD-qPCR-OUTx10
Reproducibility (interassay variation, CV)	D	NA
Power analysis	D	NA
Statistical methods for results significance	E	NA
Software (source, version)	E	NA
Cq or raw data submission with RDML	D	NA
