# Supplementary material for: Single cell atlas of the comorbidity mechanism between chronic obstructive pulmonary disease and lung adenocarcinoma: a study of multi-omics combined analysis
Source: PeerJ. 2026 Feb 6;14:e20672. doi: 10.7717/peerj.20672 (PMC12884963; doi:10.7717/peerj.20672)
Supplement: Supplemental Information 7 [file peerj-14-20672-s007.xlsx]

## Sheet: Sheet1
TYPE	GENE
m1A_writer	TRMT61A
m1A_writer	TRMT6
m1A_writer	TRMT10C
m1A_writer	TRMT61B
m1A_reader	YTHDC1
m1A_reader	YTHDF1
m1A_reader	YTHDF2
m1A_reader	YTHDF3
m1A_eraser	ALKBH1
m1A_eraser	ALKBH3
m5C_writer	NSUN5
m5C_writer	TRDMT1
m5C_writer	NSUN3
m5C_writer	NSUN4
m5C_writer	DNMT1
m5C_writer	DNMT3A
m5C_writer	NSUN7
m5C_writer	NSUN6
m5C_writer	DNMT3B
m5C_writer	NOP2
m5C_writer	NSUN2
m5C_eraser	TET2
m5C_reader	ALYREF
m6A_writer	RBM15B
m6A_writer	ZC3H13
m6A_writer	RBM15
m6A_writer	WTAP
m6A_writer	METTL14
m6A_writer	CBLL1
m6A_writer	METTL3
m6A_writer	KIAA1429
m6A_eraser	ALKBH5
m6A_eraser	FTO
m6A_reader	FMR1
m6A_reader	YTHDC1
m6A_reader	YTHDC2
m6A_reader	YTHDF3
m6A_reader	ELAVL1
m6A_reader	HNRNPA2B1
m6A_reader	HNRNPC
m6A_reader	YTHDF1
m6A_reader	YTHDF2
m6A_reader	IGF2BP1
m6A_reader	LRPPRC
